# Supplementary material for: Monochromic Radiations Provided by Light Emitted Diode (LED) Modulate Infection and Defense Response to Fire Blight in Pear Trees
Source: MDPI journal article supplement (doi:10.3390/plants10091886), 2021-09-12
Supplement: s1 [file s1]

MONOCHROMIC RADIATIONS PROVIDED BY LIGHT-EMITTED DIODE (LED) MODULATE INFECTION AND DEFENSE RESPONSE TO FIRE BLIGHT IN PEAR TREES

Tiziana Sgamma <sup>1,†</sup>, Ivano Forgione <sup>2,†</sup>, Francesca Luziatelli <sup>3</sup>, Calogero Iacona <sup>4</sup>, Roberto Mancinelli <sup>2</sup>, Brian Thomas <sup>5</sup>, Maurizio Ruzzi <sup>3</sup>, and Rosario Muleo <sup>2,\*</sup>

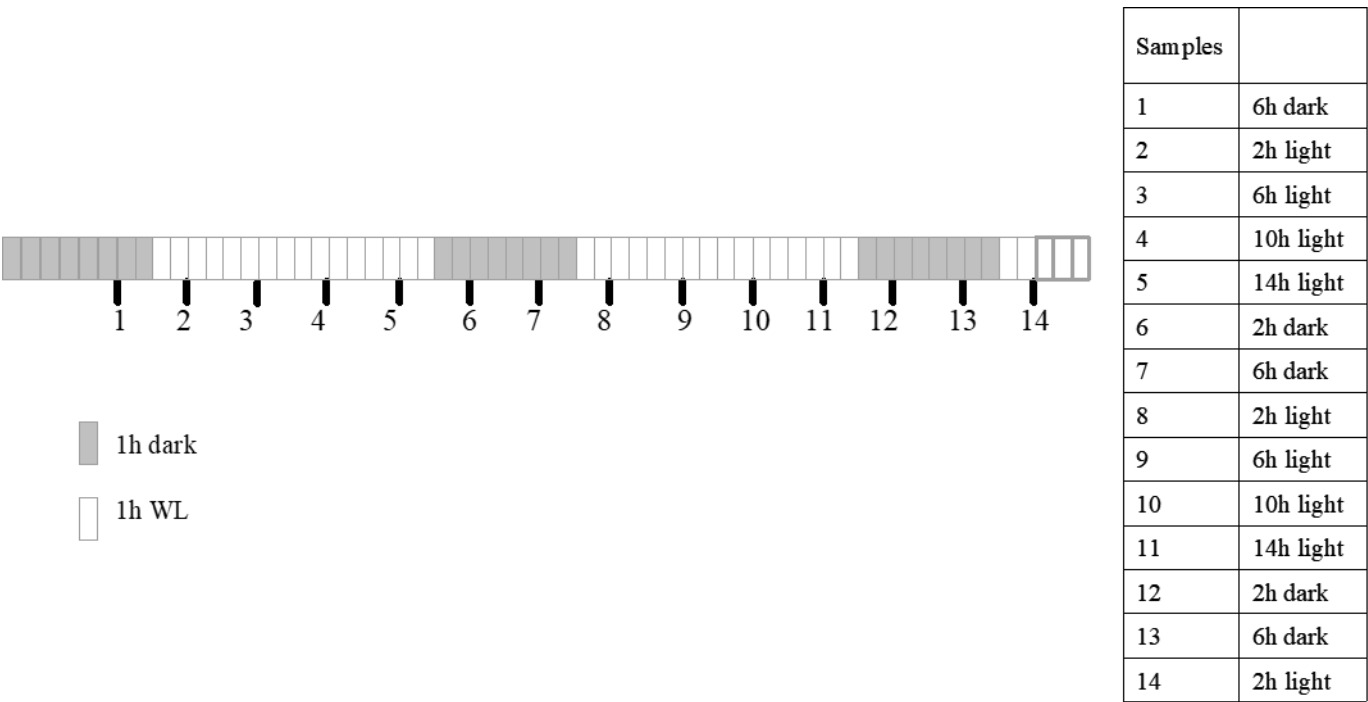

Figure S1. Representative scheme of the sampling time point used to evaluate the *PR* genes expression in *Dar Gazi-wt* grown under white light.

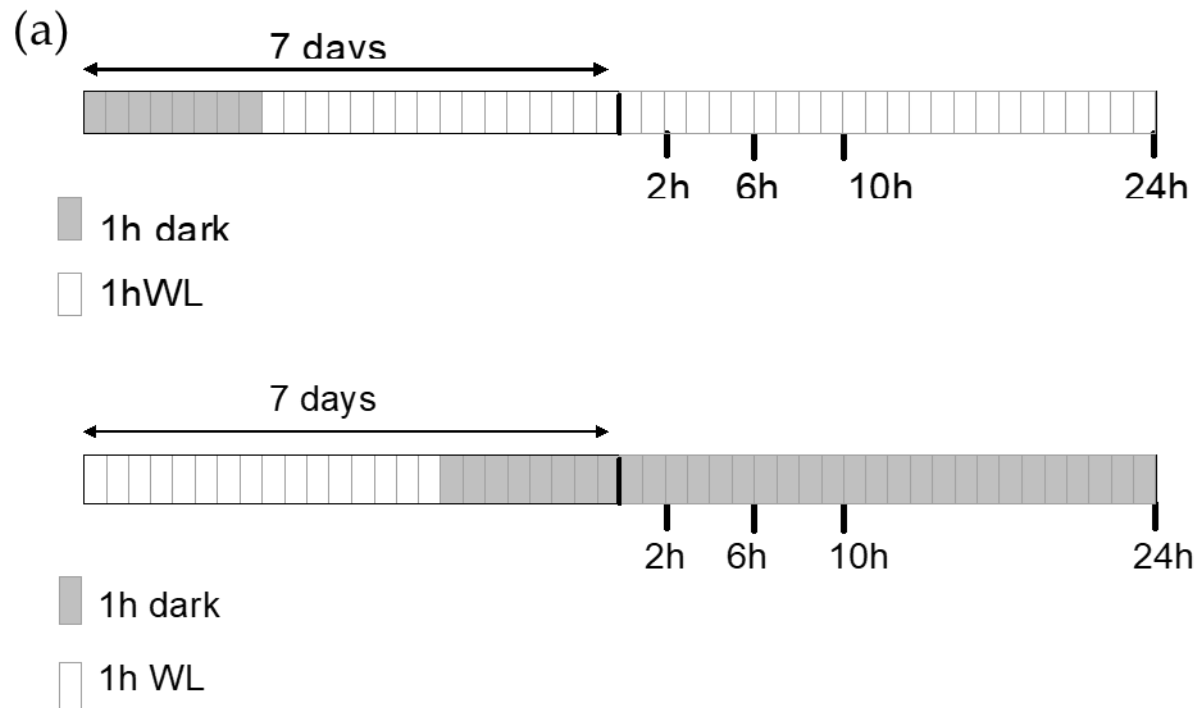

Figure S2. Representative scheme of the sampling time point used to evaluate the *PR* genes expression in *Dar Gazi-wt* exposed for 24 h under continuous lightness (a) and continuous darkness (b).

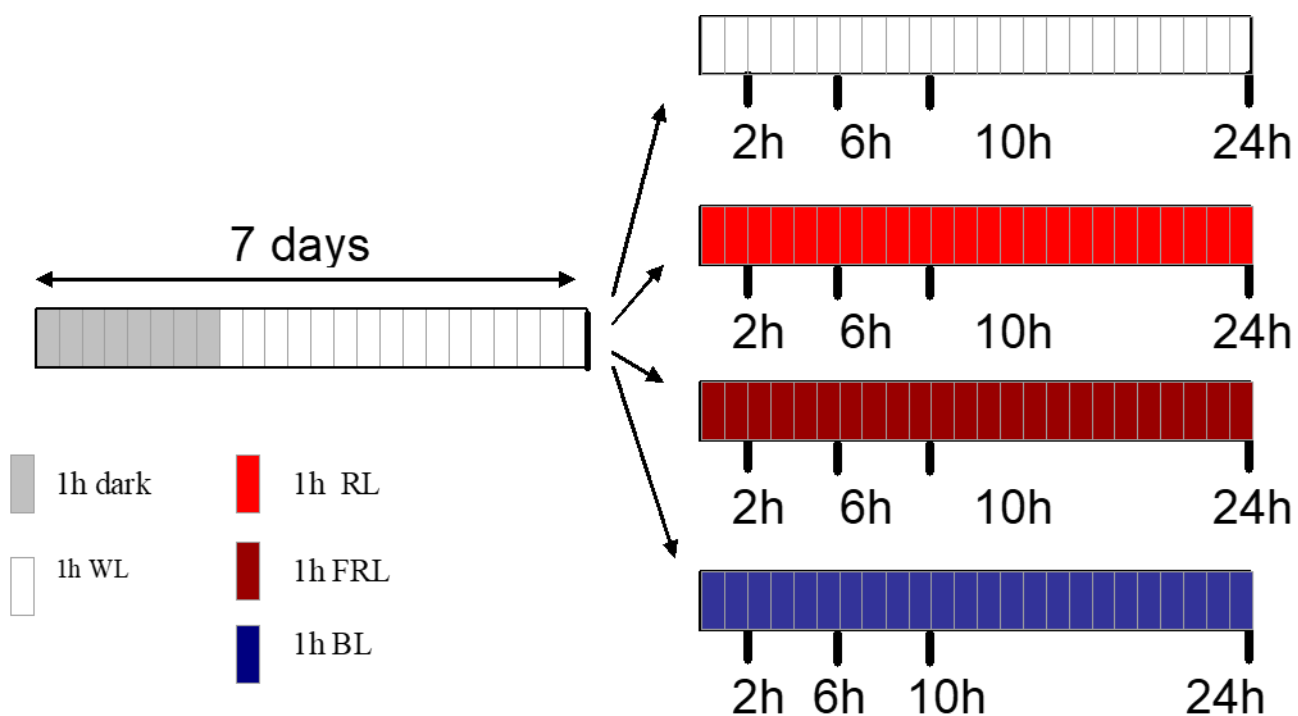

Figure S3. Representative scheme of the sampling time point used to evaluate the *PR* genes expression in *Dar Gazi*-wt, *Dar Gazi-phyB* and *Dar Gazi-cryI* plants grown in exposed for 24 h under continuous WL, RL, FRL or BL.

(a)

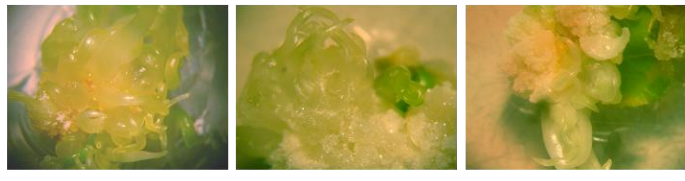

(b)

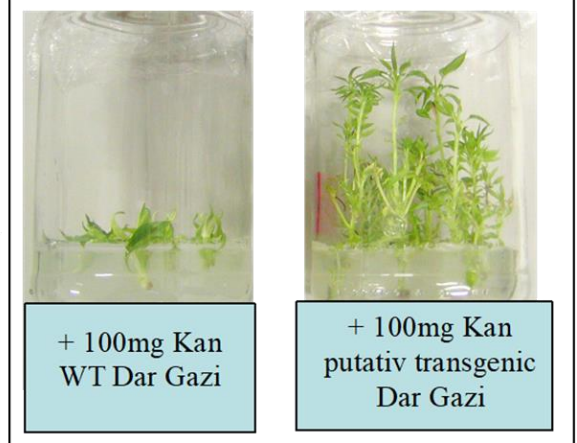

(c)

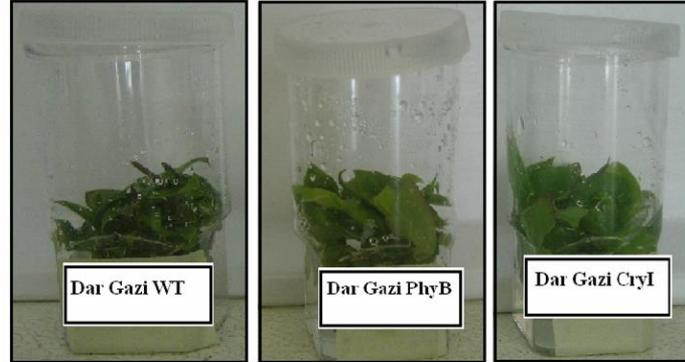

Figure S4. Dar Gazi events of regenerations after 25 days in dark condition **(a)**. Shoots were transferred to medium, containing kanamycin, to select putative transgenic lines, and subcultured four/five times for rapid and clonal multiplication **(b)**. The medium used for the in vitro selection of regenerated buds was enriched with 100 mg/l Kanamycin. **(c)** Plantlets of transgenic lines during proliferation state.

| Gene  | Gene Product                                    | Primer Forward         | Primer Reverse        | T a | Amplicon Size (bp) |
|-------|-------------------------------------------------|------------------------|-----------------------|-----|--------------------|
| phyB  | <i>Arabidopsis thaliana</i><br>pbyB             | catgaagatgagcatggagaag | cgagcttctccactagctac  | 59  | 345                |
| cry1  | <i>Lycopersicon</i><br><i>esculentum</i> cry1   | gcttctgaactgctaggc     | ggtgttcctgactggtca    | 55  | 263                |
| nptII | <i>neomycin</i><br><i>phosphotransferase II</i> | atggattgcacgcaggttct   | ccaacgctatgtcctgatagc | 58  | 658                |

Table S1. Sequence of primers used to validate the molecular insertion of *AtPHYB* and *LeCRY1* in pear genome.

Among the transgenic events two were chosen, named phyB and cryI, for the photobiological modified behaviour and tested with further PCR analysis and used with *Dar Gazi* wild type for the experiments described in this work. In Figure S6 the amplicons obtained.

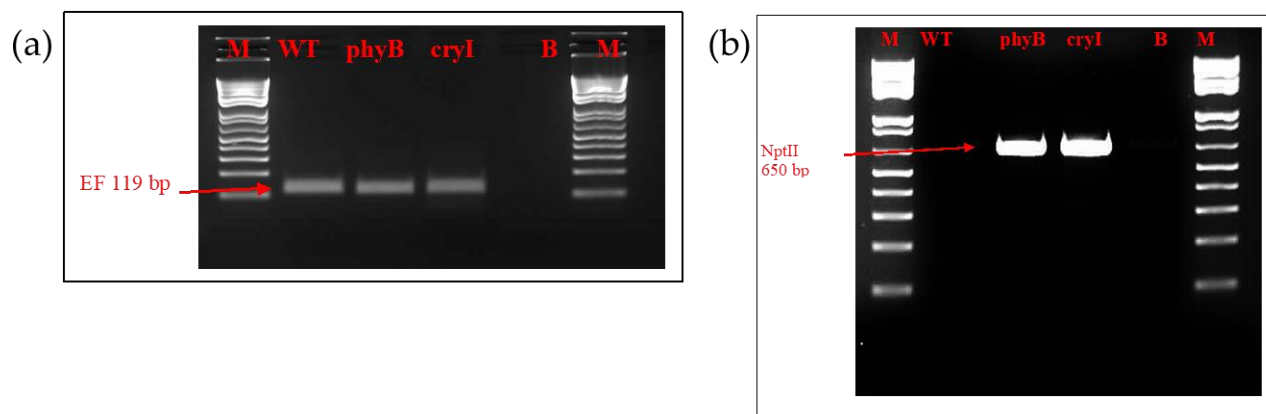

Figure S5. Detection of *eflA* gene fragments in cDNA of *Dar Gazi-wt*, *Dar Gazi-phyB* and *Dar Gazi-cryI* plants (a). M: Ladder; WT: *Dar Gazi-wt*; phyB: *Dar Gazi-phyB*; cryI: *Dar Gazi-cryI*; B: Blank. Detection of NptII gene fragments in cDNA of *Dar Gazi-wt*, *Dar Gazi-phyB* and *Dar Gazi-cryI* plants (b). M: Ladder; WT: *Dar Gazi-wt*; phyB: *Dar Gazi-phyB*; cryI: *Dar Gazi-cryI*; B: Blank.

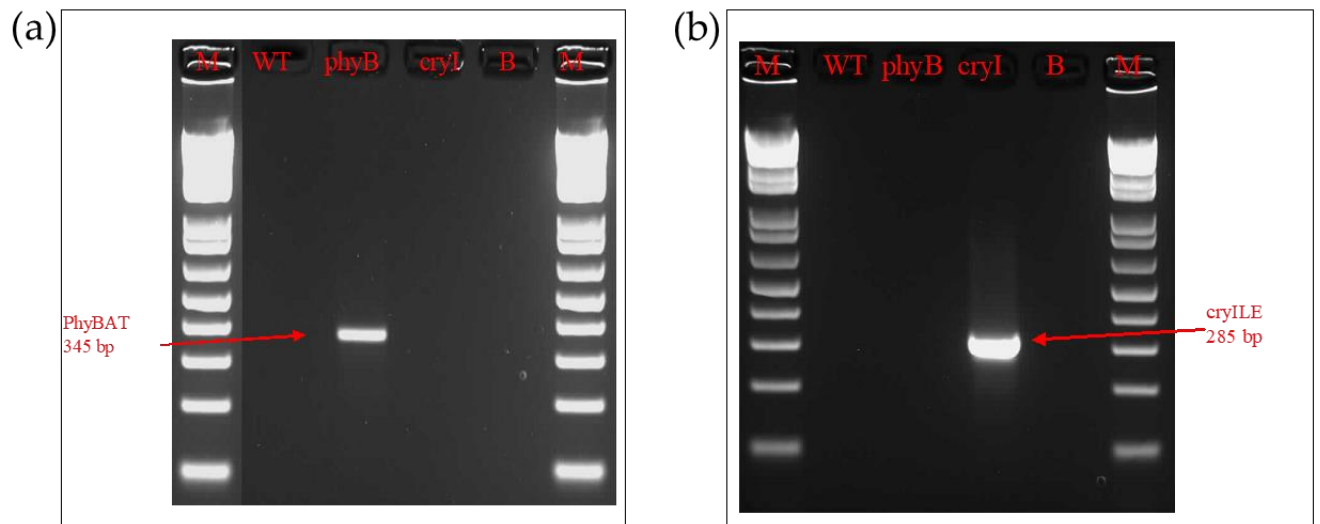

Figure S6. Detection of *AtPHYB*, using specific primers for *Arabidopsis thaliana PHYB* that amplify the PhyBAT gene fragments only in cDNA of *Dar Gazi-phyB* plants (a). M: Ladder; WT: *Dar Gazi-wt*; phyB: *Dar Gazi-phyB*; cryI: *Dar Gazi-cryI*; B: Blank. Detection of *LeCRYI*, using specific primers for *Lycopersicon esculentum CRYI* that amplify the cryILE gene fragments in cDNA of *Dar Gazi-cryI* plants (b). M: Ladder; WT: *Dar Gazi-wt*; phyB: *Dar Gazi-phyB*; cryI: *Dar Gazi-cryI*; B: Blank.
